# Supplementary material for: A Classic Near-Infrared Probe Indocyanine Green for Detecting Singlet Oxygen
Source: PubMed Central journal article supplement (PMC4783951; doi:10.3390/ijms17020219), 2016-02-06
Supplement: ijms-17-00219-s001.pdf [file ijms-17-00219-s001.pdf]

# Supplementary Materials: A Classic Near-Infrared Probe Indocyanine Green for Detecting Singlet Oxygen

Cheng-Yi Tang, Feng-Yao Wu, Min-Kai Yang, Yu-Min Guo, Gui-Hua Lu and Yong-Hua Yang

Table S1. Fluorescence of SOSG and Absorption of ICG before and after 10s laser radiation.

| ICG/SOSG                              | Before Radiation | 10 s of Radiation | <i>p</i> |
|---------------------------------------|------------------|-------------------|----------|
| <b>Fluorescence of SOSG</b>           |                  |                   |          |
| SOSG + Ce6 (0.3125 $\mu\text{g/mL}$ ) | 984.00           | 1099.00           | 0.30     |
|                                       | 811.00           | 917.00            |          |
|                                       | 903.00           | 950.00            |          |
| <b>Absorption of ICG</b>              |                  |                   |          |
| ICG + Ce6 (0.3125 $\mu\text{g/mL}$ )  | 1.76             | 1.49              | 0.00002  |
|                                       | 1.74             | 1.48              |          |
|                                       | 1.73             | 1.50              |          |

Table S2. Relative standard deviation (RSD) of the absorptive or fluorescent data during laser radiation.

| RSD<br>ICG/SOSG                        | Time of Radiation |       |       |       |       |       |       |       |       |       |
|----------------------------------------|-------------------|-------|-------|-------|-------|-------|-------|-------|-------|-------|
|                                        | 0 s               | 10 s  | 20 s  | 30 s  | 40 s  | 50 s  | 60 s  | 70 s  | 80 s  | 90 s  |
| ICG + Ce6 (0 $\mu\text{g/mL}$ )        | 1.3%              | 1.3%  | 1.3%  | 1.6%  | 1.6%  | 1.7%  | 1.8%  | 1.9%  | 2.1%  | 2.2%  |
| SOSG + Ce6 (0 $\mu\text{g/mL}$ )       | 8.4%              | 5.8%  | 10.2% | 10.1% | 10.5% | 13.2% | 12.6% | 12.9% | 13.1% | 15.0% |
| ICG + Ce6 (0.15625 $\mu\text{g/mL}$ )  | 1.9%              | 1.9%  | 1.3%  | 1.8%  | 2.1%  | 2.6%  | 1.4%  | 2.0%  | 1.9%  | 1.9%  |
| SOSG + Ce6 (0.15625 $\mu\text{g/mL}$ ) | 5.9%              | 7.6%  | 7.4%  | 8.0%  | 7.5%  | 10.1% | 8.9%  | 13.4% | 10.5% | 9.3%  |
| ICG + Ce6 (0.3125 $\mu\text{g/mL}$ )   | 2.8%              | 1.3%  | 0.0%  | 1.2%  | 2.3%  | 1.6%  | 1.8%  | 2.7%  | 1.6%  | 2.2%  |
| SOSG + Ce6 (0.3125 $\mu\text{g/mL}$ )  | 12.5%             | 6.0%  | 8.7%  | 9.6%  | 9.8%  | 9.0%  | 11.3% | 11.5% | 10.5% | 8.9%  |
| ICG + Ce6 (0.625 $\mu\text{g/mL}$ )    | 0.7%              | 3.2%  | 3.0%  | 2.4%  | 2.3%  | 2.6%  | 2.8%  | 2.2%  | 0.6%  | 2.8%  |
| SOSG + Ce6 (0.625 $\mu\text{g/mL}$ )   | 7.8%              | 2.7%  | 23.0% | 20.1% | 19.0% | 19.4% | 18.5% | 19.5% | 14.5% | 15.9% |
| ICG + Ce6 (1.25 $\mu\text{g/mL}$ )     | 1.5%              | 1.7%  | 3.1%  | 2.6%  | 4.8%  | 6.4%  | 5.6%  | 5.5%  | 4.9%  | 1.8%  |
| SOSG + Ce6 (1.25 $\mu\text{g/mL}$ )    | 11.3%             | 26.1% | 3.0%  | 10.2% | 7.5%  | 7.4%  | 10.6% | 10.0% | 12.1% | 12.7% |
| ICG + Ce6 (2.5 $\mu\text{g/mL}$ )      | 1.5%              | 1.7%  | 5.6%  | 6.0%  | 4.8%  | 8.2%  | 3.6%  | 1.0%  | 1.9%  | 0.7%  |
| SOSG + Ce6 (2.5 $\mu\text{g/mL}$ )     | 9.2%              | 30.2% | 6.0%  | 18.8% | 17.4% | 15.4% | 23.8% | 22.5% | 24.9% | 21.9% |
| ICG + Ce6 (5 $\mu\text{g/mL}$ )        | 2.3%              | 7.1%  | 3.7%  | 6.7%  | 7.6%  | 3.4%  | 3.2%  | 2.3%  | 3.0%  | 1.4%  |
| SOSG + Ce6 (5 $\mu\text{g/mL}$ )       | 16.5%             | 32.6% | 27.3% | 21.7% | 16.4% | 12.7% | 11.4% | 13.7% | 13.0% | 10.8% |

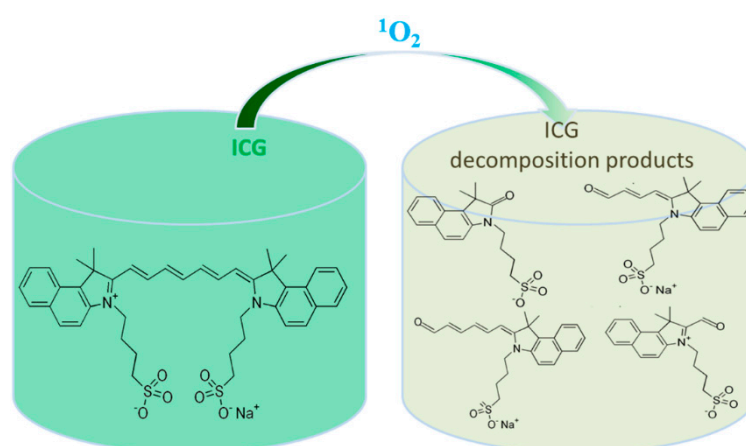

Figure S1. Tentative scheme of ICG Decomposition.

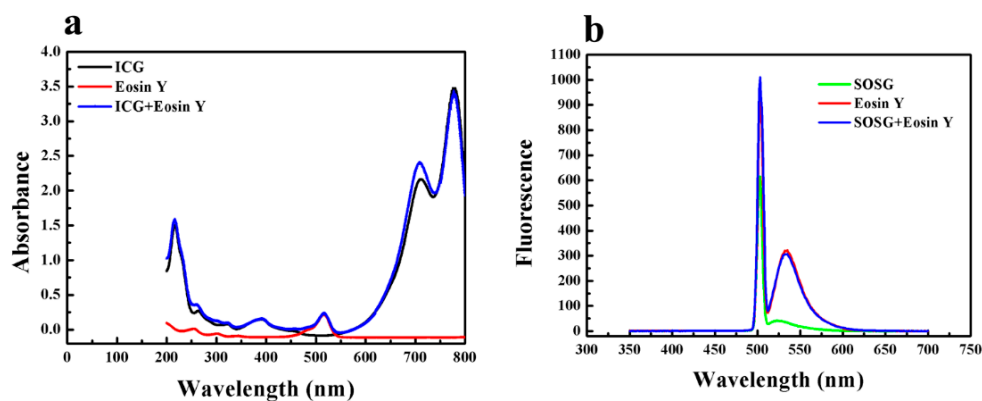

**Figure S2.** Disturbance of Eosin Y on absorption spectrum of ICG. (a) The overlay of absorbance spectra; (b) the overlay of fluorescence spectra ( $\lambda_{ex}/\lambda_{em} = 504/525$  nm).

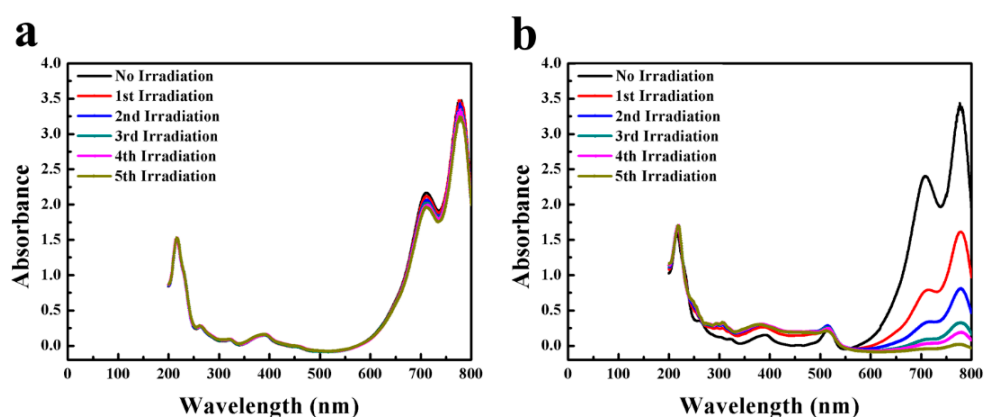

**Figure S3.** Feasibility of ICG to detect  $^1O_2$  produced by Eosin Y. (a) Stability of ICG under 532 nm irradiation; (b) sensitivity of ICG to  $^1O_2$  produced by Eosin Y.

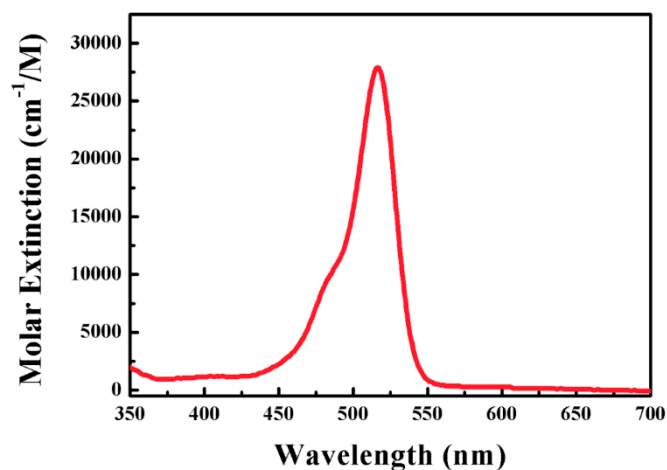

**Figure S4.** Absorption spectrum of Eosin Y in water.

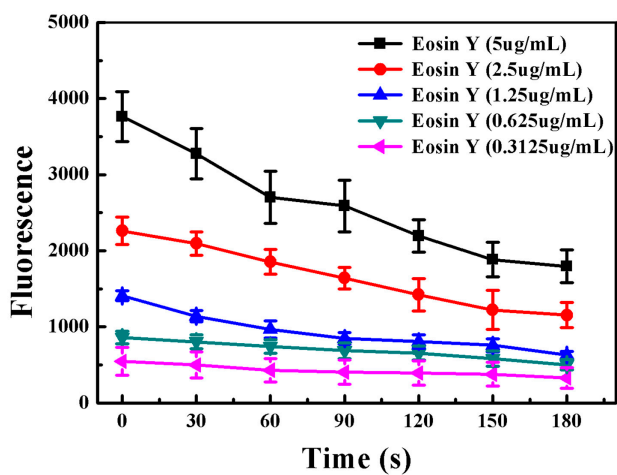

Figure S5. Tentative explanation of Eosin Y interference.

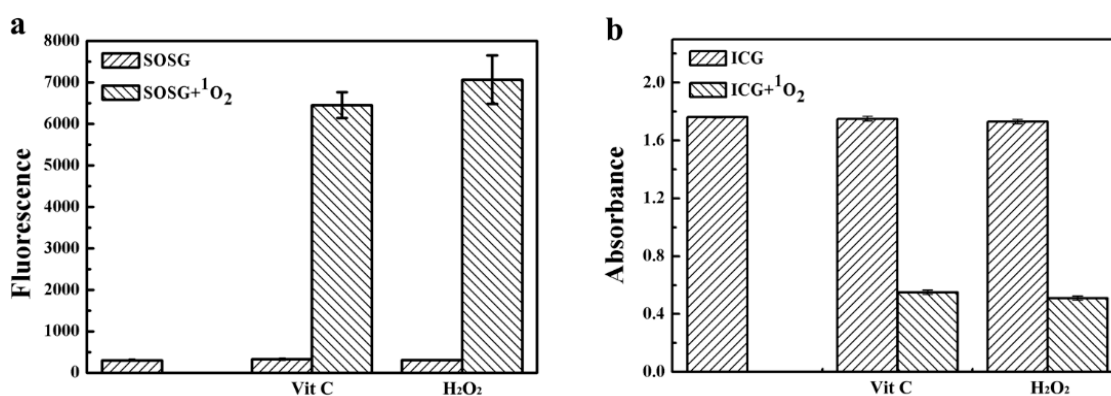

Figure S6. The selectivity of ICG. (a) The anti-interference ability of SOSG in detecting <sup>1</sup>O<sub>2</sub>; (b) the anti-interference ability of ICG in detecting <sup>1</sup>O<sub>2</sub>. (Mean ± SD, n = 3).
